# Supplementary material for: Unexpected bowing band evolution in an all-inorganic CsSn1−xPbxBr3perovskite
Source: Royal Society of Chemistry journal article supplement (doi:10.1039/d0ra03709e), 2020-01-01
Supplement: d0ra03709e1.pdf [file d0ra03709e1.pdf]

## Supplementary information

### Unexpected bowing band evolution in all-inorganic $\text{CsSn}_{1-x}\text{Pb}_x\text{Br}_3$ perovskite

Yufan Xia,<sup>‡a</sup> Yuxuan Chen,<sup>‡ab</sup> Tian Luo,<sup>a</sup> Hongyao Liang,<sup>a</sup> Yujia Gao,<sup>a</sup> Xin Xu,<sup>a</sup>  
Weiguang Xie,<sup>a</sup> Pengyi Liu,<sup>a</sup> Xin Wang,<sup>b</sup> Yu-Jun Zhao,<sup>\*c</sup> and Tingting Shi<sup>\*a</sup>

<sup>a</sup> Siyuan Laboratory, Guangzhou Key Laboratory of Vacuum Coating Technologies and New Energy Materials, Guangdong Provincial Engineering Technology Research Center of Vacuum Coating Technologies and New Energy Materials, Department of Physics, Jinan University, Guangzhou 510632, China

<sup>b</sup> National Center for International Research on Green Optoelectronics, South China Normal University, Guangzhou 510006, China

<sup>c</sup> Department of Physics, South China University of Technology, Guangzhou, Guangdong 510640, China

<sup>†</sup> Electronic supplementary information (ESI) available.

<sup>‡</sup> These authors contribute equally to this work.

#### Corresponding Author

\*E-mail: [ttshi@jnu.edu.cn](mailto:ttshi@jnu.edu.cn)

\*E-mail: [zhaoyj@scut.edu.cn](mailto:zhaoyj@scut.edu.cn)

Fig. S1 describes the schematic diagrams of most stable configurations in order to clarify the occupied sites of Sn and Pb atoms, including the  $\text{CsSn}_{1-x}\text{Pb}_x\text{Br}_3$  and  $\text{MA}_{0.5}\text{Cs}_{0.5}\text{Sn}_{1-x}\text{Pb}_x\text{Br}_3$  perovskites from  $x=0.125$  to  $x=0.875$ . The position of metal atoms indicates that Sn and Pb atoms occupy dispersedly in the most stable configurations of  $\text{CsSn}_{1-x}\text{Pb}_x\text{Br}_3$  (First line). On the contrary, Sn and Pb atoms are inclined to be clustered in the most stable configurations of  $\text{MA}_{0.5}\text{Cs}_{0.5}\text{Sn}_{1-x}\text{Pb}_x\text{Br}_3$  (Second line). Noticeably, all  $\text{Sn}^{2+}$  cations prefer to get close to  $\text{MA}^+$  cation to reduce the local distortion due to its large size. All stable configurations of mixed Cs-MA system show the similar structural properties that Sn atoms are like to stay together near  $\text{MA}^+$  cation.

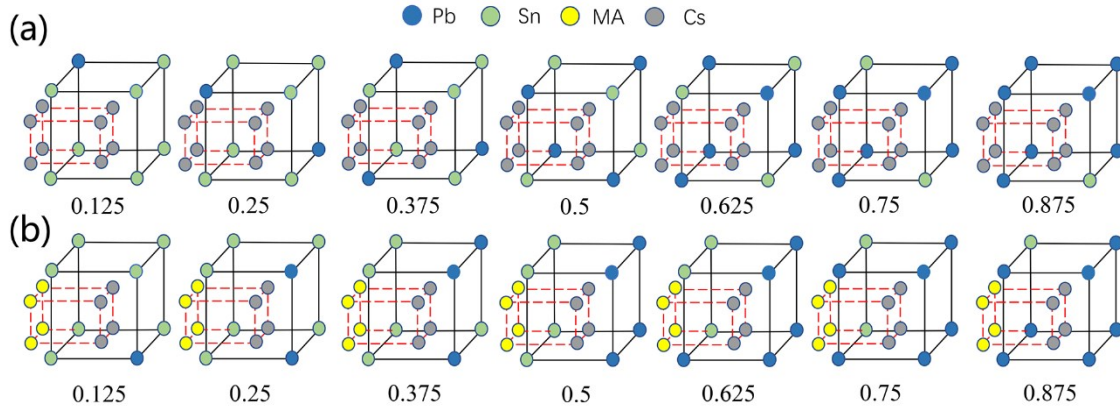

**Fig. S1.** The most stable configurations obtained by alloying with two metal species for (a)  $\text{CsSn}_{1-x}\text{Pb}_x\text{Br}_3$  and (b)  $\text{MA}_{0.5}\text{Cs}_{0.5}\text{Sn}_{1-x}\text{Pb}_x\text{Br}_3$  compositions.

Table S1 and S2 contain total energy, bandgap (GGA, GGA+SOC,  $\Delta\text{SOC}$ ) and lattice constant of  $\text{MA}_{0.5}\text{Cs}_{0.5}\text{Sn}_{1-x}\text{Pb}_x\text{Br}_3$  and  $\text{CsSn}_{1-x}\text{Pb}_x\text{Br}_3$  configurations. It can be clearly seen that the total energy gradually decreases while  $x$  increases in following systems. In reality, this phenomenon is related to the ratio of Pb and Sn in crystal structures. Additionally, the

band gap by GGA+SOC method is a nonlinear trend in  $\text{MA}_{0.5}\text{Cs}_{0.5}\text{Sn}_{1-x}\text{Pb}_x\text{Br}_3$ , and the band gaps are lower than pure Sn configuration ( $x=0$ ) when  $0.125 \leq x \leq 0.75$ , which displays the obvious bowing effect of bandgap following the Vegard's law. Furthermore, when  $x$  is equal to 0.25, the decreasing trend of band gap reaches a minimum value (0.626eV). Bowing band evolution is also found in all-inorganic perovskite system ( $\text{CsSn}_{1-x}\text{Pb}_x\text{Br}_3$ ), but its bowing parameter is the smallest. These results show that the  $\text{MA}^+$  cation will affect the structural configurations and then influence the electronic properties of bowing band evolution. In addition, the linear variation of lattice constants obeys the Vegard's law in all structures summarized in Table S2.

**Table S1.** Total energy calculations, band gap of GGA, GGA+SOC, and  $\Delta$ SOC for selected stable compositions of  $\text{MA}_{0.5}\text{Cs}_{0.5}\text{Sn}_{1-x}\text{Pb}_x\text{Br}_3$  and  $\text{CsSn}_{1-x}\text{Pb}_x\text{Br}_3$  configurations. Units are given in eV for total energy and bandgap.

| Configuration                                                         |           | Total Energy | GGA   | GGA+SOC | $\Delta$ SOC |
|-----------------------------------------------------------------------|-----------|--------------|-------|---------|--------------|
| $\text{MA}_{0.5}\text{Cs}_{0.5}\text{Sn}_{1-x}\text{Pb}_x\text{Br}_3$ | $x=0$     | -274.051     | 0.974 | 0.709   | 0.265        |
|                                                                       | $x=0.125$ | -274.152     | 1.057 | 0.649   | 0.407        |
|                                                                       | $x=0.25$  | -274.260     | 1.153 | 0.626   | 0.527        |
|                                                                       | $x=0.375$ | -274.377     | 1.254 | 0.649   | 0.605        |
|                                                                       | $x=0.5$   | -274.500     | 1.352 | 0.659   | 0.693        |
|                                                                       | $x=0.625$ | -274.591     | 1.447 | 0.671   | 0.776        |
|                                                                       | $x=0.75$  | -274.689     | 1.567 | 0.692   | 0.875        |
|                                                                       | $x=0.875$ | -274.789     | 1.725 | 0.761   | 0.964        |
|                                                                       | $x=1$     | -274.898     | 1.913 | 0.843   | 1.070        |
| $\text{CsSn}_{1-x}\text{Pb}_x\text{Br}_3$                             | $x=0$     | -126.669     | 0.638 | 0.291   | 0.347        |
|                                                                       | $x=0.125$ | -126.751     | 0.751 | 0.283   | 0.469        |
|                                                                       | $x=0.25$  | -126.830     | 0.875 | 0.315   | 0.560        |
|                                                                       | $x=0.375$ | -126.915     | 1.007 | 0.353   | 0.654        |
|                                                                       | $x=0.5$   | -127.008     | 1.172 | 0.433   | 0.739        |
|                                                                       | $x=0.625$ | -127.094     | 1.281 | 0.446   | 0.835        |
|                                                                       | $x=0.75$  | -127.188     | 1.419 | 0.500   | 0.918        |
|                                                                       | $x=0.875$ | -127.288     | 1.542 | 0.542   | 1.000        |
|                                                                       | $x=1$     | -127.394     | 1.765 | 0.672   | 1.093        |

**Table S2.** Relaxed lattice constant for selected compositions of the  $\text{MA}_{0.5}\text{Cs}_{0.5}\text{Sn}_{1-x}\text{Pb}_x\text{Br}_3$  and  $\text{CsSn}_{1-x}\text{Pb}_x\text{Br}_3$  configurations. Units are given in Å for lattice constant.

| Configuration                                                         |           | Lattice constant average | a      | b      | c      |
|-----------------------------------------------------------------------|-----------|--------------------------|--------|--------|--------|
| $\text{MA}_{0.5}\text{Cs}_{0.5}\text{Sn}_{1-x}\text{Pb}_x\text{Br}_3$ | $x=0$     | 11.952                   | 11.962 | 11.947 | 11.948 |
|                                                                       | $x=0.125$ | 11.958                   | 11.986 | 11.945 | 11.944 |
|                                                                       | $x=0.25$  | 11.977                   | 12.009 | 11.978 | 11.945 |
|                                                                       | $x=0.375$ | 11.987                   | 12.030 | 11.966 | 11.966 |
|                                                                       | $x=0.5$   | 12.014                   | 12.037 | 12.001 | 12.003 |
|                                                                       | $x=0.625$ | 12.014                   | 12.043 | 11.999 | 11.999 |
|                                                                       | $x=0.75$  | 12.027                   | 12.056 | 12.020 | 12.006 |
|                                                                       | $x=0.875$ | 12.040                   | 12.067 | 12.026 | 12.026 |
|                                                                       | $x=1$     | 12.058                   | 12.075 | 12.049 | 12.050 |
| $\text{CsSn}_{1-x}\text{Pb}_x\text{Br}_3$                             | $x=0$     | 11.772                   | 11.772 | 11.772 | 11.772 |
|                                                                       | $x=0.125$ | 11.800                   | 11.800 | 11.800 | 11.800 |
|                                                                       | $x=0.25$  | 11.818                   | 11.818 | 11.818 | 11.818 |
|                                                                       | $x=0.375$ | 11.850                   | 11.850 | 11.850 | 11.850 |
|                                                                       | $x=0.5$   | 11.874                   | 11.874 | 11.874 | 11.874 |
|                                                                       | $x=0.625$ | 11.901                   | 11.901 | 11.901 | 11.901 |
|                                                                       | $x=0.75$  | 11.928                   | 11.928 | 11.928 | 11.928 |
|                                                                       | $x=0.875$ | 11.951                   | 11.951 | 11.951 | 11.951 |
|                                                                       | $x=1$     | 11.978                   | 11.978 | 11.978 | 11.978 |

The TDOS and PDOS of Cs-,  $\text{MA}_{0.25}\text{Cs}_{0.75}$ - and  $\text{MA}_{0.5}\text{Cs}_{0.5}$ - based perovskites with GGA+SOC calculation are shown in Fig. S2-S4. For all structures, the dominant

components for contributing the band edges are very similar. VBM is derived from Sn-5s, Pb-6s, Br-4p orbitals and Sn-5p, Pb-6p orbitals contribute most to the CBM.

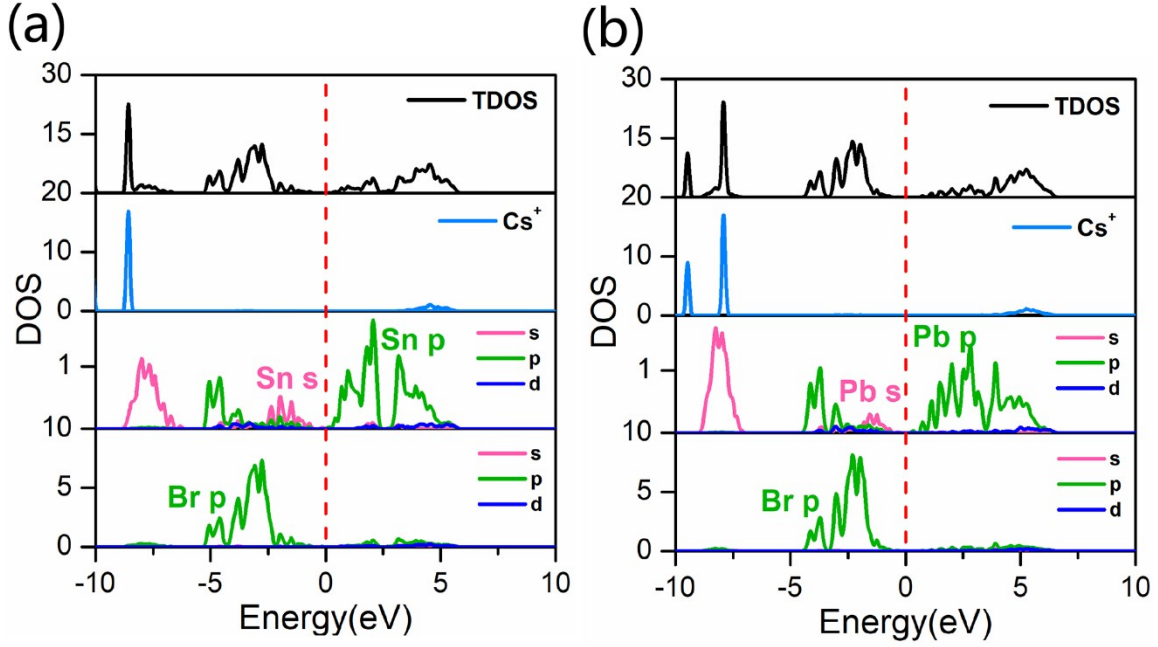

**Fig. S2.** Total density of state (TDOS) and projected density of states (PDOS) of (a) CsSnBr<sub>3</sub> and (b) CsPbBr<sub>3</sub>.

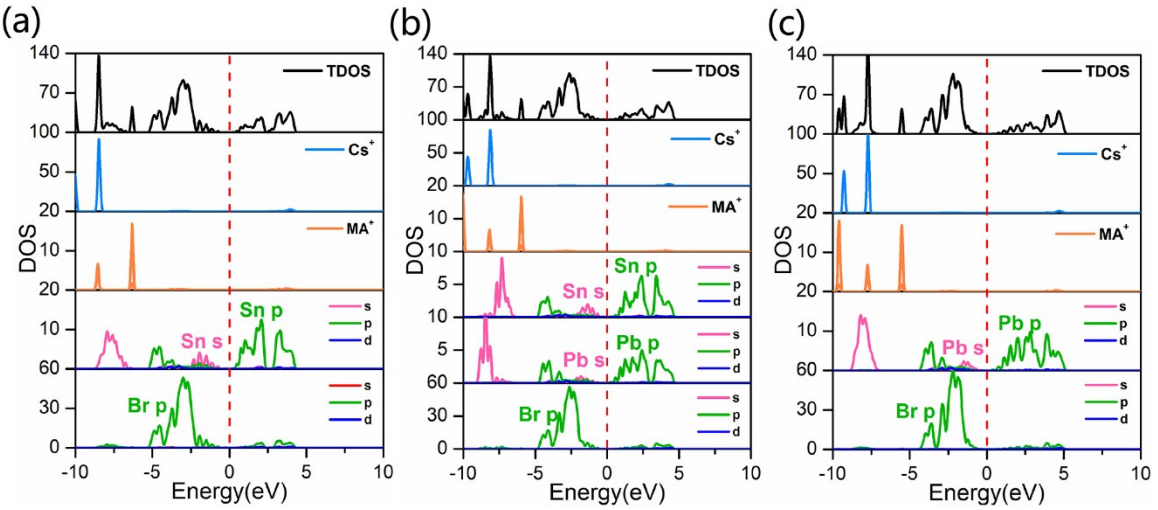

**Fig. S3.** TDOS and PDOS of (a) MA<sub>0.25</sub>Cs<sub>0.75</sub>SnBr<sub>3</sub>, (b) MA<sub>0.25</sub>Cs<sub>0.75</sub>Sn<sub>0.5</sub>Pb<sub>0.5</sub>Br<sub>3</sub> and (c) MA<sub>0.25</sub>Cs<sub>0.75</sub>PbBr<sub>3</sub>.

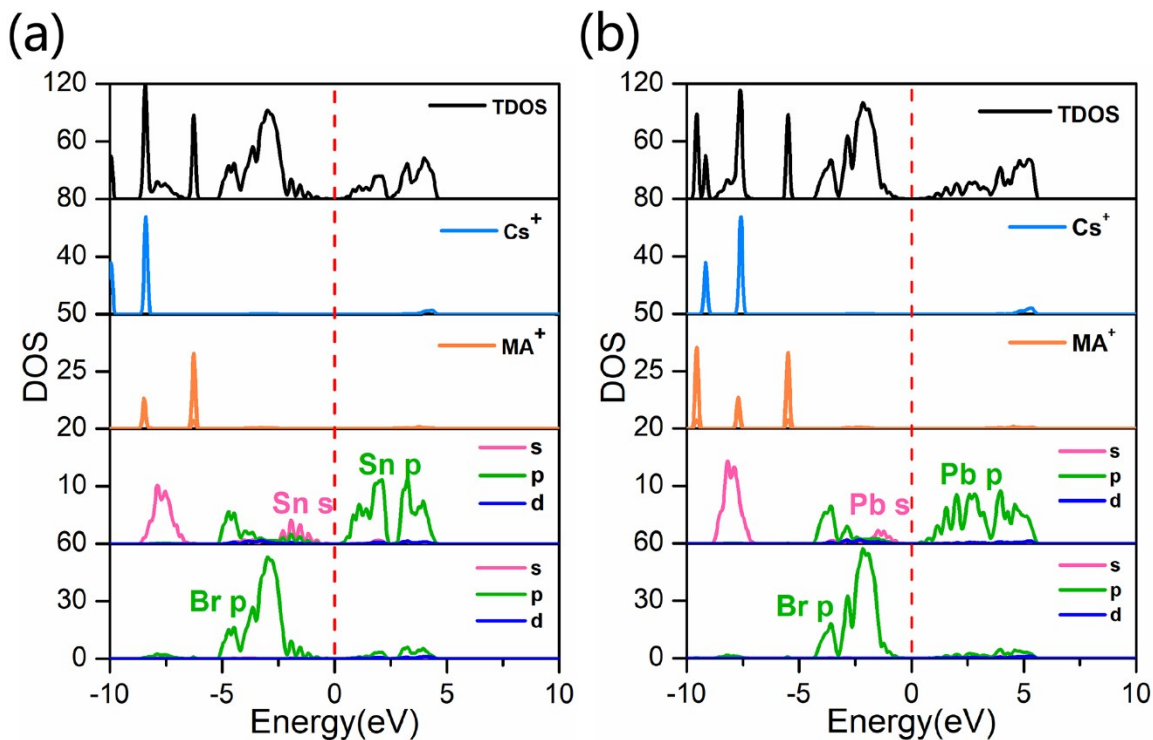

**Fig. S4.** TDOS and PDOS of (a)  $\text{MA}_{0.5}\text{Cs}_{0.5}\text{SnBr}_3$ , and (b)  $\text{MA}_{0.5}\text{Cs}_{0.5}\text{PbBr}_3$ .

The band gaps (GGA, GGA+SOC,  $\Delta\text{SOC}$ ) of  $\text{MA}_y\text{Cs}_{1-y}\text{Sn}_{1-x}\text{Pb}_x\text{Br}_3$  ( $0.125 \leq y \leq 0.5$ ) systems are described in Fig. S5-6. It can be clearly seen that the bowing band evolutions are gradually enhanced for pushing the band gap lower than the extreme values (pure Sn and Pb systems) when  $y$  increases due to the increase of bowing parameter  $b$  values.

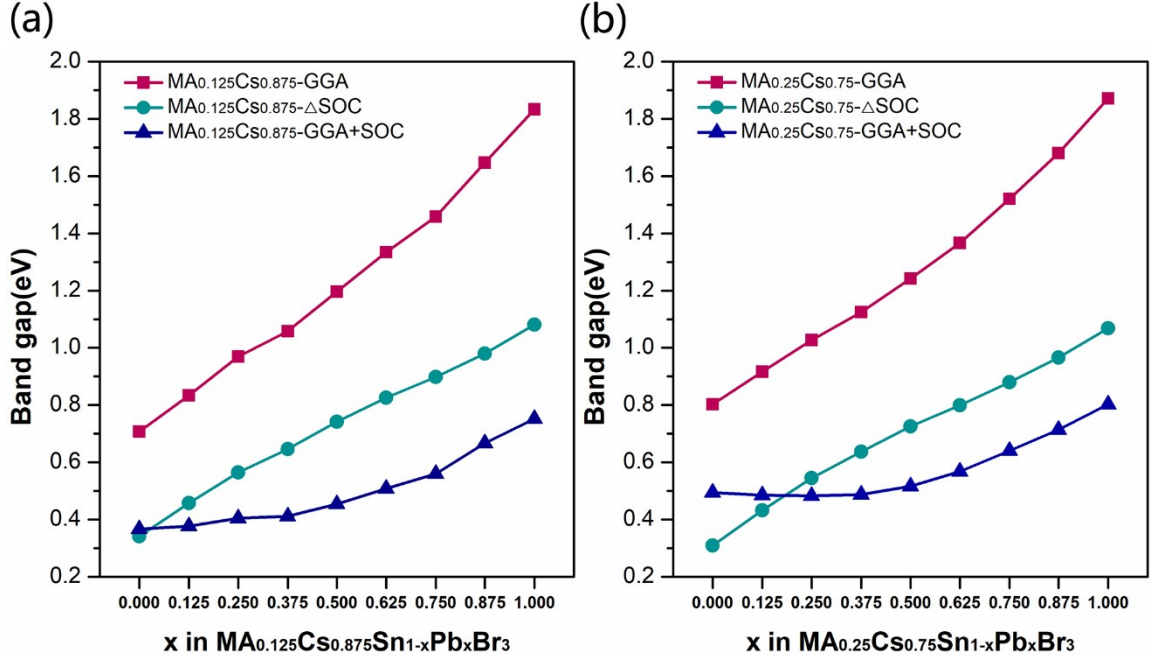

**Fig. S5.** (a)  $\text{MA}_{0.125}\text{Cs}_{0.875}\text{Sn}_{1-x}\text{Pb}_x\text{Br}_3$  as a function of composition  $x$ , (b)  $\text{MA}_{0.25}\text{Cs}_{0.75}\text{Sn}_{1-x}\text{Pb}_x\text{Br}_3$  as a function of composition  $x$ .

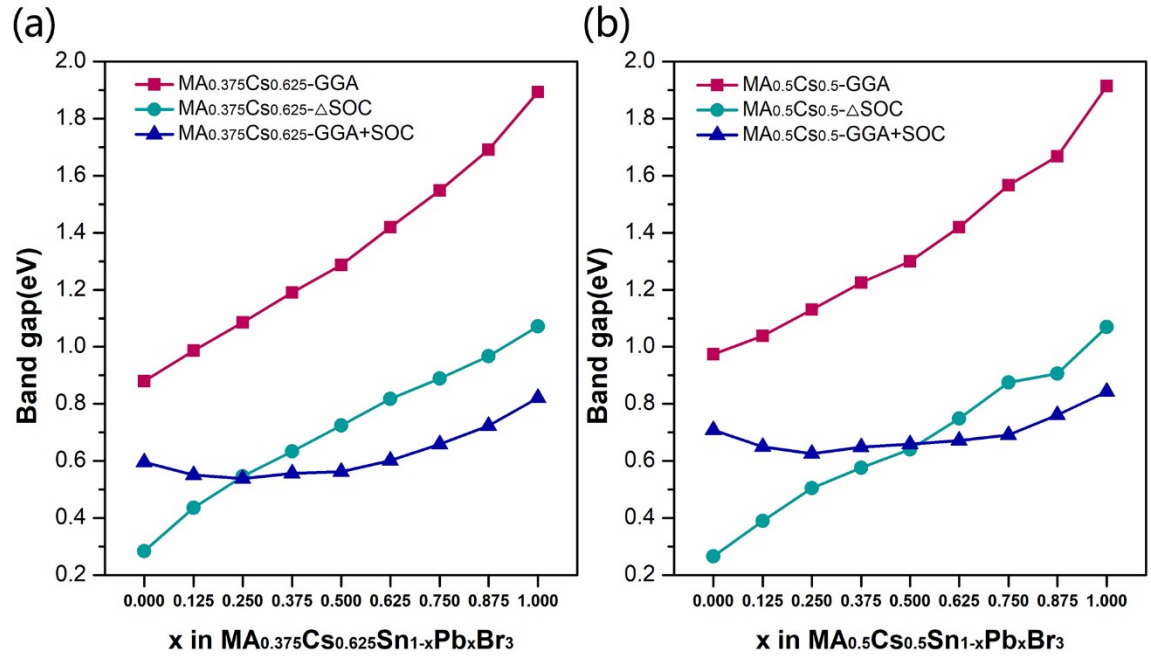

**Fig. S6.** (a)  $\text{MA}_{0.375}\text{Cs}_{0.625}\text{Sn}_{1-x}\text{Pb}_x\text{Br}_3$  as a function of composition  $x$ , (b)  $\text{MA}_{0.5}\text{Cs}_{0.5}\text{Sn}_{1-x}\text{Pb}_x\text{Br}_3$  as a function of composition  $x$ .

Considering the influence of vdW interaction for the organic  $\text{MA}^+$  cations, we used

semi-local functional optB86b that has been proved to work well in perovskite  $\text{CH}_3\text{NH}_3\text{PbI}_3$  with vdW-DF.<sup>1-3</sup> In this work, we also set the same vdW parameter by GGA+SOC method to further calculate the organic perovskite systems. Fig. S7 shows us the curve fittings of  $\text{MA}_{0.5}\text{Cs}_{0.5}\text{Sn}_{1-x}\text{Pb}_x\text{Br}_3$  with vdW-DF and without vdW-DF. Though the absolute values of band gap change, the bowing band evolutions are very similar due to the identical bowing parameters in Table S3. The band gaps considering vdW interaction are slightly larger than that of without considering vdW interaction.

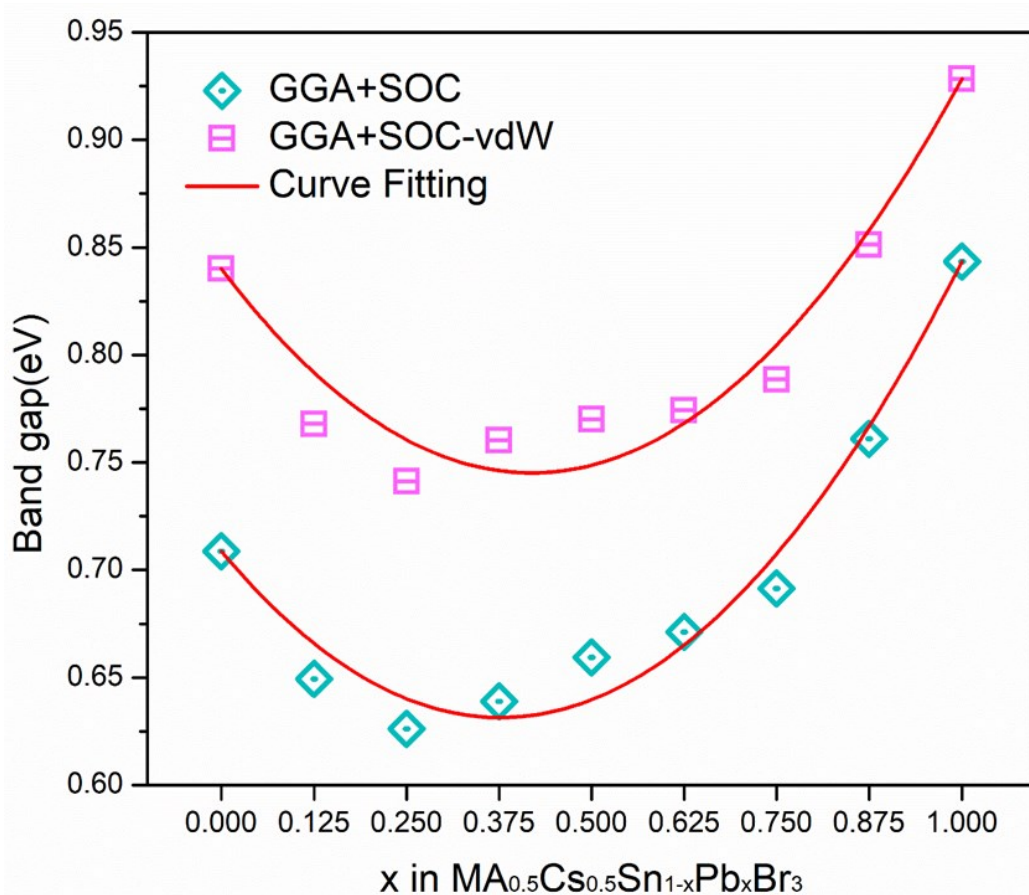

**Fig. S7** Calculated band gap evolutions of  $\text{MA}_{0.5}\text{Cs}_{0.5}\text{Sn}_{1-x}\text{Pb}_x\text{Br}_3$  with/without vdW-DF as a function of composition x

**Table S3.** Fitting quadratic equation and bowing parameter of  $\text{MA}_{0.5}\text{Cs}_{0.5}\text{Sn}_{1-x}\text{Pb}_x\text{Br}_3$  system.

| System                                                                         | Fitting quadratic equation     | bowing parameter |
|--------------------------------------------------------------------------------|--------------------------------|------------------|
| $\text{MA}_{0.5}\text{Cs}_{0.5}\text{Sn}_{1-x}\text{Pb}_x\text{Br}_3$          | $E_g = 0.54x^2 - 0.40x + 0.71$ | 0.54             |
| $\text{MA}_{0.5}\text{Cs}_{0.5}\text{Sn}_{1-x}\text{Pb}_x\text{Br}_3$ -<br>vdW | $E_g = 0.54x^2 - 0.45x + 0.84$ | 0.54             |

#### Reference

- 1 Y. Andersson, E. Hult, H. Rydberg, P. Apell, B. I. Lundqvist and D. C. Langreth, in *Electronic Density Functional Theory*, Springer, 1998, pp. 243–260.
- 2 J. Klimeš, D. R. Bowler and A. Michaelides, *J. Phys. Condens. Matter*, 2009, **22**, 22201.
- 3 J. Klimeš, D. R. Bowler and A. Michaelides, *Phys. Rev. B - Condens. Matter Mater. Phys.*, 2011, **83**, 1–13.
